# Supplementary material for: Disease Control with Upadacitinib in Patients with Psoriatic Arthritis: A Post Hoc Analysis of the Randomized, Placebo-Controlled SELECT-PsA 1 and 2 Phase 3 Trials
Source: PubMed Central journal article supplement — Rheumatol Ther. 2022 May 23;9(4):1181–91. doi: 10.1007/s40744-022-00449-6 (PMC9314475; doi:10.1007/s40744-022-00449-6), 2022-05-23
Supplement: 40744_2022_449_MOESM1_ESM.pdf [file 40744_2022_449_MOESM1_ESM.pdf]

# 1 Supplementary Appendix

## 2 Supplementary Table 1 Baseline characteristics in a) SELECT-PsA 1 and b) SELECT-

3 PsA 2

4 a)

|                                                            | Upadacitinib<br>15 mg<br>(n=429) | Placebo<br>(n=423) | Adalimumab<br>(n=429) |
|------------------------------------------------------------|----------------------------------|--------------------|-----------------------|
| Female sex, n (%)                                          | 238 (55)                         | 211 (50)           | 222 (52)              |
| Age, years                                                 | 51.6 (12.2)                      | 50.4 (12.2)        | 51.4 (12.0)           |
| White race, n (%)                                          | 386 (90)                         | 377 (89)           | 375 (87)              |
| Time since psoriatic arthritis diagnosis, years            | 6.2 (7.4)                        | 6.2 (7.0)          | 5.9 (7.1)             |
| nbDMARD* at baseline, n (%)                                |                                  |                    |                       |
| Methotrexate alone                                         | 279 (65)                         | 267 (63)           | 270 (63)              |
| Methotrexate + other nbDMARD                               | 20 (5)                           | 26 (6)             | 16 (4)                |
| nbDMARD other than methotrexate                            | 54 (13)                          | 54 (13)            | 61 (14)               |
| Glucocorticoid use at baseline, n (%)                      | 73 (17)                          | 70 (17)            | 72 (17)               |
| Tender joint count of 68 joints                            | 20.4 (14.7)                      | 20.0 (14.3)        | 20.1 (13.8)           |
| Swollen joint count of 66 joints                           | 11.6 (9.3)                       | 11.0 (8.2)         | 11.6 (8.8)            |
| High-sensitivity C-reactive protein >2.87 mg/L, n (%)      | 324 (76)                         | 324 (77)           | 308 (72)              |
| HAQ-DI score                                               | 1.2 (0.7)                        | 1.1 (0.6)          | 1.1 (0.6)             |
| Patient's Assessment of Pain (NRS 0–10)                    | 6.2 (2.1)                        | 6.1 (2.1)          | 6.0 (2.1)             |
| Patient's Global Assessment of Disease Activity (NRS 0–10) | 6.6 (2.0)                        | 6.3 (2.0)          | 6.3 (2.0)             |
| Affected body-surface area ≥3%, n (%)                      | 214 (50)                         | 211 (50)           | 211 (49)              |
| PASI score (for baseline body surface area ≥3%)            | 9.8 (10.0)                       | 11.2 (11.4)        | 9.4 (8.5)             |
| sIGA of psoriasis, n (%)                                   |                                  |                    |                       |
| 0                                                          | 34 (8)                           | 24 (6)             | 34 (8)                |
| 1                                                          | 73 (17)                          | 86 (20)            | 65 (15)               |
| 2                                                          | 170 (40)                         | 167 (39)           | 181 (42)              |
| 3                                                          | 133 (31)                         | 119 (28)           | 132 (31)              |
| 4                                                          | 19 (4)                           | 27 (6)             | 17 (4)                |
| Presence of enthesitis, n (%) <sup>†</sup>                 | 270 (63)                         | 241 (57)           | 265 (62)              |
| Leeds Enthesitis Index (for baseline >0)                   | 2.6 (1.6)                        | 2.7 (1.5)          | 2.5 (1.4)             |
| Presence of dactylitis, n (%) <sup>‡</sup>                 | 136 (32)                         | 126 (30)           | 127 (30)              |
| DAPSA score                                                | 55.7 (28.4)                      | 55.0 (27.7)        | 54.8 (29.5)           |
| PASDAS score                                               | 6.3 (1.0)                        | 6.2 (1.1)          | 6.2 (1.0)             |

5

6 **b)**

|                                                            | <b>Upadacitinib 15 mg<br/>(n=211)</b> | <b>Placebo<br/>(n=212)</b> |
|------------------------------------------------------------|---------------------------------------|----------------------------|
| Female sex, n (%)                                          | 113 (54)                              | 120 (57)                   |
| Age, years                                                 | 53.0 (12.0)                           | 54.1 (11.5)                |
| White race, n (%)                                          | 183 (87)                              | 186 (88)                   |
| Time since psoriatic arthritis diagnosis, years            | 9.6 (8.4)                             | 11.0 (10.3)                |
| nbDMARD* at baseline, n (%)                                |                                       |                            |
| Methotrexate alone                                         | 74 (35)                               | 75 (35)                    |
| Methotrexate + other nbDMARD                               | 6 (3)                                 | 7 (3)                      |
| nbDMARD other than methotrexate                            | 18 (9)                                | 18 (8)                     |
| Glucocorticoid use at baseline, n (%)                      | 22 (10)                               | 24 (11)                    |
| Tender joint count of 68 joints                            | 24.9 (17.3)                           | 25.3 (17.6)                |
| Swollen joint count of 66 joints                           | 11.3 (8.2)                            | 12.0 (8.9)                 |
| High-sensitivity C-reactive protein >2.87 mg/L, n (%)      | 126 (60)                              | 121 (57)                   |
| HAQ-DI score                                               | 1.1 (0.6)                             | 1.2 (0.7)                  |
| Patient's Assessment of Pain (NRS 0–10)                    | 6.4 (2.1)                             | 6.6 (2.1)                  |
| Patient's Global Assessment of Disease Activity (NRS 0–10) | 6.8 (1.9)                             | 6.8 (2.0)                  |
| Affected body-surface area ≥3%, n (%)                      | 130 (62)                              | 131 (62)                   |
| PASI score (for baseline body surface area ≥3%)            | 10.1 (9.2)                            | 11.7 (11.4)                |
| sIGA of psoriasis, n (%)                                   |                                       |                            |
| 0                                                          | 9 (4)                                 | 17 (8)                     |
| 1                                                          | 31 (15)                               | 32 (15)                    |
| 2                                                          | 82 (39)                               | 59 (28)                    |
| 3                                                          | 78 (37)                               | 88 (42)                    |
| 4                                                          | 11 (5)                                | 16 (8)                     |
| Presence of enthesitis, n (%) <sup>†</sup>                 | 133 (63)                              | 144 (68)                   |
| Leeds Enthesitis Index (for baseline >0)                   | 3.0 (1.6)                             | 3.3 (1.7)                  |
| Presence of dactylitis, n (%) <sup>‡</sup>                 | 55 (26)                               | 64 (30)                    |
| DAPSA score                                                | 60.8 (31.0)                           | 61.2 (32.6)                |
| PASDAS score                                               | 6.3 (1.1)                             | 6.4 (1.2)                  |

7 Data are mean (SD) unless otherwise stated

8 \*Permitted concomitant nbDMARDs included methotrexate, sulfasalazine, leflunomide, apremilast, hydroxychloroquine,  
9 bucillamine, and iguratimod.

10 <sup>†</sup>Presence of enthesitis defined as a score >0 on the Leeds Enthesitis Index

11 <sup>‡</sup>Presence of dactylitis defined as a score >0 on the Leeds Dactylitis Index

- 12 *DAPSA* Disease Activity in Psoriatic Arthritis; *HAQ-DI* Health Assessment Questionnaire–Disability Index; *nbDMARD*
- 13 non-biologic disease-modifying antirheumatic drug; *NRS* numeric rating scale; *PASDAS* Psoriatic Arthritis Disease Activity
- 14 Score; *SD* standard deviation; *sIGA* static Investigator Global Assessment

15 **Supplementary Fig 1** Percentage of patients achieving A) DAPSA LDA, B) PASDAS LDA, C) DAPSA remission and D) PASDAS remission  
16 in SELECT-PSA 1 and SELECT-PSA 2

17 **A)**

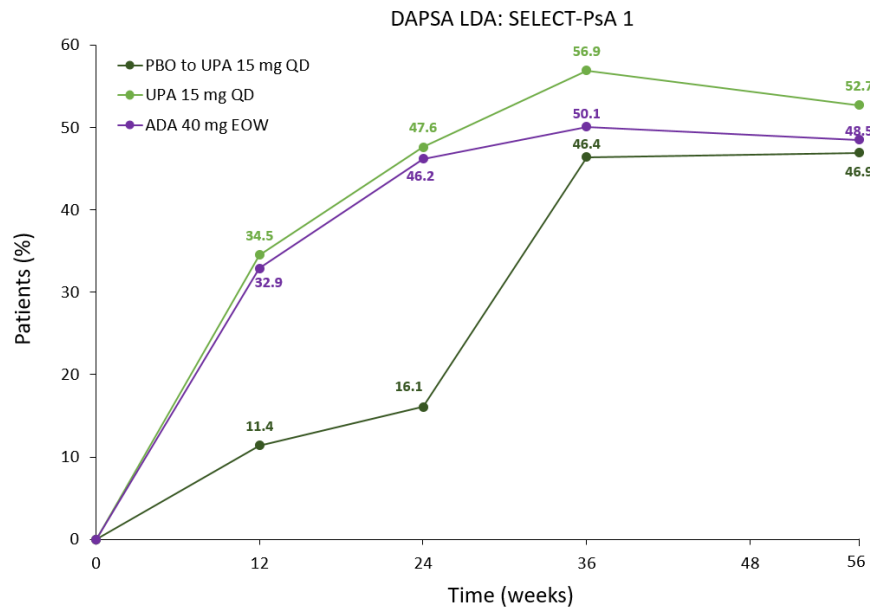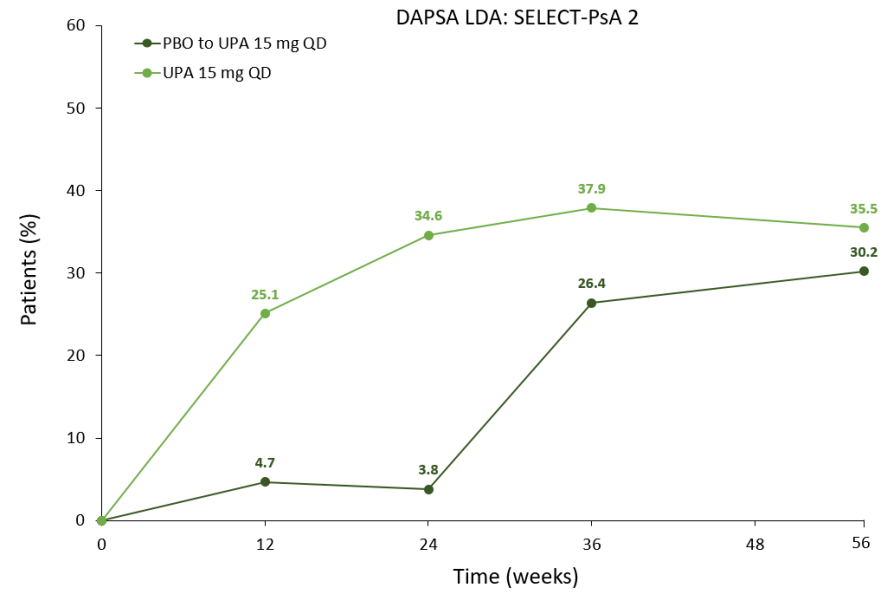

18

19

20 B)

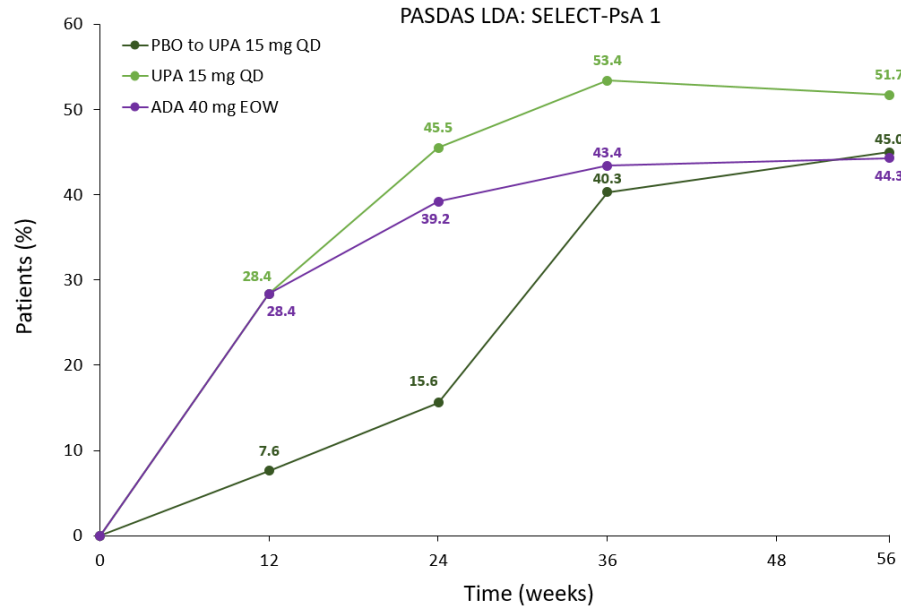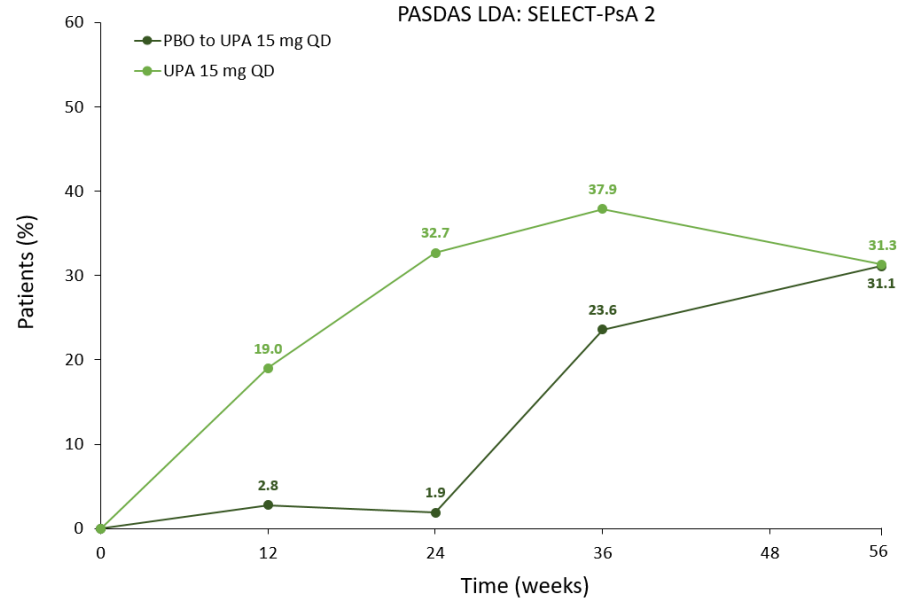

21

22

23 C)

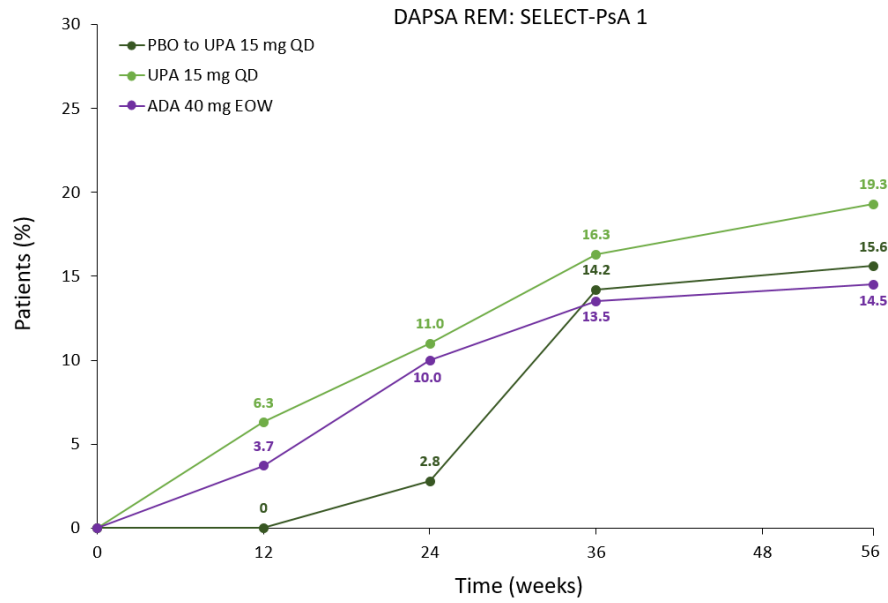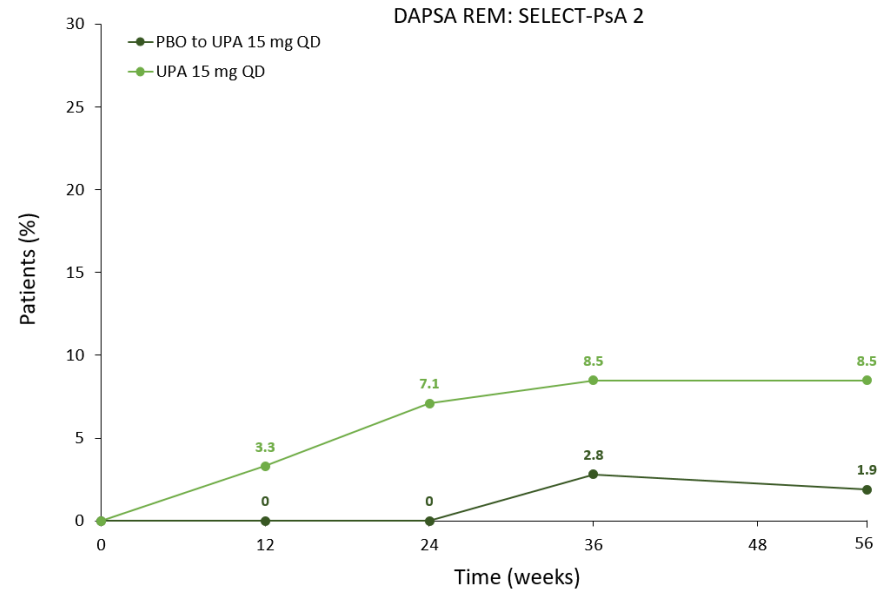

24

25 **D)**

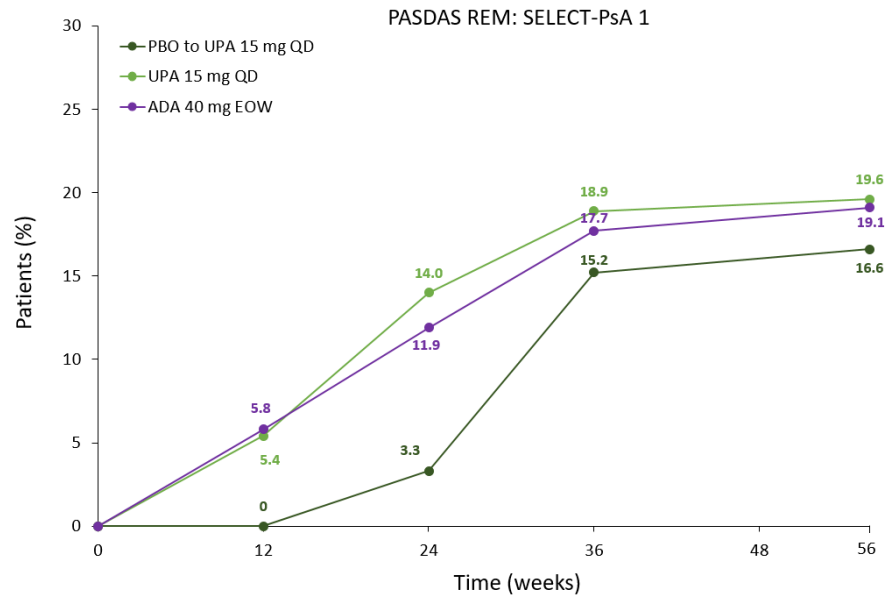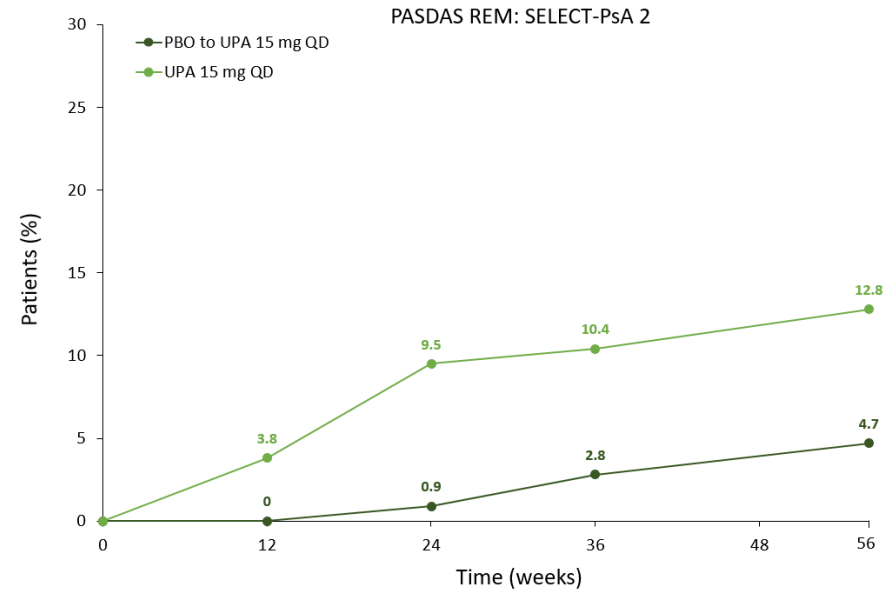

26

27

28 *EOW* every other week; *DAPSA* Disease Activity in Psoriatic Arthritis; *LDA* low disease activity; *PASDAS* Psoriatic Arthritis Disease Activity Score; *PBO*

29 placebo; *QD* once daily; *REM* remission; *UPA* upadacitinib
